# Supplementary material for: Trajectories of class–switching‐related egg and cow's milk allergen‐specific immunoglobulin isotype formation and its modification by eczema with low‐ and high‐affinity immunoglobulin E during early infancy
Source: PubMed Central journal article supplement (PMC6485699; doi:10.1002/iid3.245), 2019-03-11
Supplement: IID3-7-74-s001.pdf [file IID3-7-74-s001.pdf]

*Supplemental information*

**Trajectories of class-switching related egg and cow's milk allergen-specific immunoglobulin isotype formation and its modification by eczema with low- and high-affinity IgE during early infancy**

Makoto Irahara<sup>1,2</sup>, Wakako Shinahara<sup>1</sup>, Mayumi Sugimoto<sup>2</sup>, Yukiko Ogawa<sup>3</sup>, Keiji Shitsukawa<sup>4</sup>, Kenji Kubota<sup>1</sup>, Limin Yang<sup>5</sup>, Yukihiro Ohya<sup>5</sup>, Hirohisa Saito<sup>5</sup>, Shoji Kagami<sup>2</sup>, Kokichi Arisawa<sup>6</sup> & Hiroshi Kido\*<sup>1</sup>

<sup>1</sup>Division of Enzyme Chemistry, Institute for Enzyme Research; <sup>2</sup>Department of Pediatrics;

<sup>3</sup>Department of Pediatrics Tokushima Prefecture Naruto Hospital, Tokushima, Japan;

<sup>4</sup>Department of Obstetrics and Gynecology, Tokushima Prefecture Naruto Hospital,

Tokushima, Japan; <sup>5</sup>National Center for Child Health and Development, Tokyo, Japan;

<sup>6</sup>Department of Preventive Medicine, Graduate School of Medicine, Tokushima University, Tokushima, Japan.

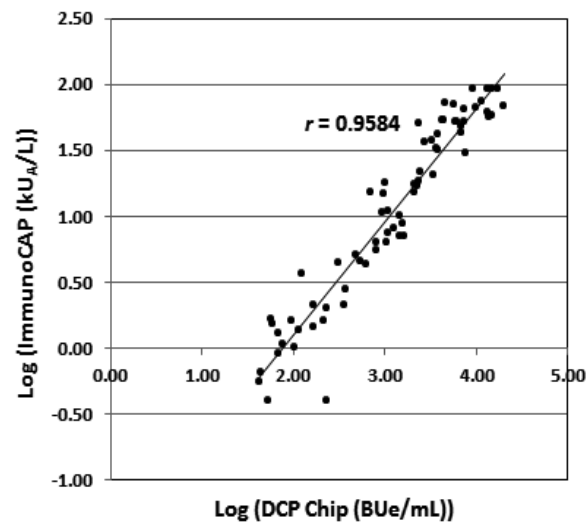

$$\text{Log (ImmunoCAP (kU}_A\text{/L))} = 0.8602\text{Log (DCP Chip (BUe/mL))} - 1.6163$$

Figure S1 Correlation coefficient and equation of casein-specific IgE levels between UniCAP (kU<sub>A</sub>/mL) and DCP microarray (BUe/mL).

**Table S1.** Serial changes in feeding type-related production of casein-specific immunoglobulins in breast, formula and mixed feeding infants from birth to 6-months of age. Data are median (IQR).

| Casein- specific immunoglobulins | CB             | 2 months of age  |                              |                  | 4 months of age   |                              |                  | 6 months of age   |                              |                  |
|----------------------------------|----------------|------------------|------------------------------|------------------|-------------------|------------------------------|------------------|-------------------|------------------------------|------------------|
|                                  |                | Breast (n=31)    | Mixed (n=47)                 | Formula (n=6)    | Breast (n=31)     | Mixed (n=47)                 | Formula (n=6)    | Breast (n=31)     | Mixed (n=47)                 | Formula (n=6)    |
| <b>IgE (BUe/mL)</b>              | 0.01 (0.01-41) | 0.01 (0.01-0.01) | 0.01 (0.01-30)               | 21 (3-142)       | 0.01 (0.01-0.01)  | 0.01 (0.01-88)               | 84 (33-144)      | 0.01 (0.01-0.01)  | 37 #, † (0.01-159)           | 149 (46-170)     |
|                                  |                |                  | <i>P</i> =0.004 <sup>a</sup> |                  |                   | <i>P</i> =0.002 <sup>a</sup> |                  |                   | <i>P</i> =0.001 <sup>a</sup> |                  |
| <b>IgG1 (BUg1/mL)</b>            | 1363(527-2787) | 729 # (335-956)  | 2134 (438-3959)              | 3740 (3554-4840) | 282 # † (173-689) | 2380 (795-4496)              | 3929 (3529-4800) | 212 # † (151-391) | 2308 (699-4812)              | 4560 (3390-6690) |
|                                  |                |                  | <i>P</i> =0.001 <sup>a</sup> |                  |                   | <i>P</i> <0.001 <sup>a</sup> |                  |                   | <i>P</i> <0.001 <sup>a</sup> |                  |
| <b>IgG2 (BUg2/mL)</b>            | 78 (61-166)    | 58 # (50-72)     | 94 (65-286)                  | 379 (180-432)    | 56 # (50-67)      | 114 (65-266)                 | 484 (179-710)    | 53 # (50-63)      | 108 (70-408)                 | 449 (182-748)    |
|                                  |                |                  | <i>P</i> <0.001 <sup>a</sup> |                  |                   | <i>P</i> <0.001 <sup>a</sup> |                  |                   | <i>P</i> <0.001 <sup>a</sup> |                  |
| <b>IgG3 (BUg3/mL)</b>            | 50 (50-50)     | 50 (50-50)       | 56 (50-128)                  | 131 (109-292)    | 50 (50-50)        | 65 (50-139)                  | 185 (84-396)     | 50 (50-50)        | 62 (50-139)                  | 128 (70-372)     |
|                                  |                |                  | <i>P</i> <0.001 <sup>a</sup> |                  |                   | <i>P</i> <0.001 <sup>a</sup> |                  |                   | <i>P</i> <0.001 <sup>a</sup> |                  |
| <b>IgG4 (BUg4/mL)</b>            | 88 (51-226)    | 56 (50-82)       | 67 (50-82)                   | 80 (50-90)       | 54 (50- 81)       | 52 (50-86)                   | 81 (70-288)      | 50 (50-62)        | 58 (50-88)                   | 150 (51-566)     |
|                                  |                |                  | <i>P</i> =0.42 <sup>a</sup>  |                  |                   | <i>P</i> =0.04 <sup>a</sup>  |                  |                   | <i>P</i> =0.008 <sup>a</sup> |                  |
| <b>IgA (Bua/mL)</b>              | 3 (3-5)        | 3 (3-6)          | 19 (4-49)                    | 40 (30-76)       | 3 (3-5)           | 12 (4-49)                    | 33 (18-70)       | 3 (3-10)          | 11 (5-40)                    | 26 (12-92)       |
|                                  |                |                  | <i>P</i> <0.001 <sup>a</sup> |                  |                   | <i>P</i> <0.001 <sup>a</sup> |                  |                   | <i>P</i> =0.001 <sup>a</sup> |                  |

Differences among three feeding type groups were tested by the Kruskal-Wallis test and <sup>a</sup>*P*-value less than 0.05 was considered significant. Significant difference between the two different time points shown in Figure 2: #, vs CB, and †, vs 2-months of age (Wilcoxon signed-rank test with Bonferroni correction. *P*-value <0.01 was judged as significant).

**Table S2.** Serial changes in production of feeding type-related OVA-specific immunoglobulins in infants on breast, formula and mixed feeding from birth to 6-months of age.

| OVA- specific immunoglobulins | CB             | 2 months of age  |                             |               | 4 months of age |                             |                  | 6 months of age  |                             |                  |
|-------------------------------|----------------|------------------|-----------------------------|---------------|-----------------|-----------------------------|------------------|------------------|-----------------------------|------------------|
|                               |                | Breast (n=31)    | Mixed (n=47)                | Formula (n=6) | Breast (n=31)   | Mixed (n=47)                | Formula (n=6)    | Breast (n=31)    | Mixed (n=47)                | Formula (n=6)    |
| <b>IgE level (BUe/mL)</b>     | 0.01 (0.01-80) | 0.01 # (0.01-41) | 0.01 # (0.01-0.01)          | 0.01 (0.01-3) | 0.01 (0.01-91)  | 0.01 (0.01-10)              | 0.01 (0.01-0.01) | 7 † (0.01-447)   | 0.01 †§ (0.01-170)          | 0.01 (0.01-0.01) |
|                               |                |                  | <i>P</i> =0.33 <sup>a</sup> |               |                 | <i>P</i> =0.07 <sup>a</sup> |                  |                  | <i>P</i> =0.08 <sup>a</sup> |                  |
| <b>IgG1 level (BUg1/mL)</b>   | 527 (240-1136) | 266 # (165-363)  | 152 # (125-288)             | 305 (122-344) | 160 (121-523)   | 180 (111-400)               | 141 (105-175)    | 176 § (119-1008) | 408 †§ (156-1609)           | 153 (107-319)    |
|                               |                |                  | <i>P</i> =0.05 <sup>a</sup> |               |                 | <i>P</i> =0.39 <sup>a</sup> |                  |                  | <i>P</i> =0.17 <sup>a</sup> |                  |
| <b>IgG2 level (BUg2/mL)</b>   | 137 (71-276)   | 82 # (61-96)     | 68 # (60-93)                | 80 (56-162)   | 61 #† (56-70)   | 61 # (56-76)                | 80 (65-116)      | 59 (54-74)       | 63 (59-72)                  | 61 (58-64)       |
|                               |                |                  | <i>P</i> =0.61 <sup>a</sup> |               |                 | <i>P</i> =0.26 <sup>a</sup> |                  |                  | <i>P</i> =0.16 <sup>a</sup> |                  |
| <b>IgG3 level (BUg3/mL)</b>   | 50 (50-50)     | 50 (50-50)       | 50 (50-50)                  | 50 (50-50)    | 50 (50-50)      | 50 (50-50)                  | 50 (50-50)       | 50 (50-50)       | 50 (50-50)                  | 50 (50-50)       |
|                               |                |                  | <i>P</i> =1.0 <sup>a</sup>  |               |                 | <i>P</i> =0.27 <sup>a</sup> |                  |                  | <i>P</i> =0.33 <sup>a</sup> |                  |
| <b>IgG4 level (BUg4/mL)</b>   | 540 (113-1364) | 113 (56-341)     | 70 (50-220)                 | 115 (50-472)  | 56 (50-88)      | 52 (50-71)                  | 58 (51-102)      | 50 (50-52)       | 50 (50-53)                  | 50 (50-75)       |
|                               |                |                  | <i>P</i> =0.30 <sup>a</sup> |               |                 | <i>P</i> =0.32 <sup>a</sup> |                  |                  | <i>P</i> =0.47 <sup>a</sup> |                  |
| <b>IgA level (Bua/mL)</b>     | 3 (3-4)        | 5 (3-7)          | 3 (31-5)                    | 4 (4-4)       | 4 (3-8)         | 3 (3-5)                     | 3 (3-5)          | 5 (3-10)         | 5 (3-13)                    | 3 (3-5)          |
|                               |                |                  | <i>P</i> =0.05 <sup>a</sup> |               |                 | <i>P</i> =0.17 <sup>a</sup> |                  |                  | <i>P</i> =0.43 <sup>a</sup> |                  |

Data are median (interquartile range). <sup>a</sup>*P*-value for the difference among the three feeding type groups analyzed by the Kruskal-Wallis test. #, vs CB, †, vs 2-months of age, § vs 4-months of age (Figure 4), by Wilcoxon signed-rank test with Bonferroni correction. *P*-value <0.01 was considered significant.

**Table S3.** OVA-specific IgE, IgG1 levels and IC<sub>50</sub> values of IgE against OVA in each red and black circles infants shown in Figure 6F.

| Subject number | Feeding type | OVA-specific immunoglobulins |                    |                      | Circles |
|----------------|--------------|------------------------------|--------------------|----------------------|---------|
|                |              | IgE IC <sub>50</sub> (nM)    | IgE level (BUe/mL) | IgG1 level (BUg1/mL) |         |
| 2              | Mixed        | 25.4                         | 435                | 4553                 | black   |
| 5              | Mixed        | 57.2                         | 244                | 3081                 | black   |
| 10             | Mixed        | 9.2                          | 771                | 1288                 | red     |
| 13             | Mixed        | 75.3                         | 720                | 5976                 | black   |
| 23             | Breast       | 5.8                          | 205                | 782                  | red     |
| 34             | Mixed        | 6.5                          | 1259               | 1002                 | red     |
| 36             | Mixed        | 84.9                         | 276                | 279                  | red     |
| 45             | Mixed        | 61.3                         | 222                | 2416                 | black   |
| 47             | Mixed        | 1.9                          | 825                | 791                  | red     |
| 49             | Breast       | 8.7                          | 447                | 3189                 | black   |
| 64             | Breast       | 78.0                         | 452                | 6143                 | black   |
| 65             | Breast       | 9.1                          | 265                | 1272                 | red     |
| 71             | Breast       | 8.3                          | 1176               | 738                  | red     |
| 73             | Mixed        | 47.3                         | 470                | 2145                 | black   |
| 74             | Mixed        | 15.4                         | 917                | 594                  | red     |
| 76             | Mixed        | 4.6                          | 929                | 522                  | red     |
| 80             | Breast       | 6.7                          | 1567               | 410                  | red     |
| 81             | Breast       | 5.3                          | 504                | 480                  | red     |
| 82             | Breast       | 6.3                          | 904                | 435                  | red     |
| 83             | Breast       | 18.8                         | 1517               | 168                  | red     |
